# Supplementary material for: Decoding the similarities and differences among mycobacterial species
Source: PubMed Central journal article supplement (PMC5595346; doi:10.1371/journal.pntd.0005883), 2017-08-30
Supplement: pntd.0005883.s001.pdf [file pntd.0005883.s001.pdf]

**S1 Table. Pairwise similarities between mycobacterial genomes.** The matrix reflects the number of orthologous clusters having representation from any two given mycobacterial species. The maximum similarity in terms of having the maximum number of orthologous pairs between two genomes is marked in bold red and is represented row-wise.

|       | MYCTU | MYCS2       | MYCUA | MYCA9 | MYCTU | MYCA9 | MYCLE | MYCKA       | MYCVP       | MYCMM       |
|-------|-------|-------------|-------|-------|-------|-------|-------|-------------|-------------|-------------|
| MYCTU | -     | 2507        | 2614  | 2245  | 2341  | 2590  | 1399  | 2991        | 2533        | <b>2999</b> |
| MYCS2 | 2507  | -           | 2673  | 3028  | 3312  | 3104  | 1318  | 3111        | <b>3995</b> | 3181        |
| MYCUA | 2614  | 2673        | -     | 2340  | 2441  | 2759  | 1356  | 3094        | 2701        | <b>3668</b> |
| MYCA9 | 2245  | <b>3028</b> | 2340  | -     | 2488  | 2578  | 1262  | 2584        | 2864        | 2692        |
| MYCTH | 2341  | <b>3312</b> | 2441  | 2488  | -     | 2879  | 1285  | 2822        | 3317        | 2839        |
| MYCA1 | 2590  | 3104        | 2759  | 2578  | 2879  | -     | 1341  | <b>3294</b> | 3089        | 3261        |
| MYCLE | 1399  | 1318        | 1356  | 1262  | 1285  | 1341  | -     | 1398        | 1324        | <b>1413</b> |
| MYCKA | 2991  | 3111        | 3094  | 2584  | 2822  | 3294  | 1398  | -           | 3166        | <b>3808</b> |
| MYCVP | 2533  | <b>3995</b> | 2701  | 2864  | 3317  | 3089  | 1324  | 3166        | -           | 3213        |
| MYCMM | 2999  | 3181        | 3668  | 2692  | 2839  | 3261  | 1413  | <b>3808</b> | 3213        | -           |

MYCTU: *M. tuberculosis*, MYCS2: *M. smegmatis*, MYCUA: *M. ulcerans*, MYCA9: *M. abscessus*, MYCTH: *M. thermoresistibile*, MYCA1: *M. avium*, MYCLE: *M. leprae*, MYCKA: *M. kansasii*, MYCVP: *M. vanbaalenii*, MTCMM: *M. marinum*.
