# Supplementary material for: Decoding the similarities and differences among mycobacterial species
Source: PubMed Central journal article supplement (PMC5595346; doi:10.1371/journal.pntd.0005883), 2017-08-30
Supplement: pntd.0005883.s004.pdf [file pntd.0005883.s004.pdf]

**S4 Table. GO enriched terms in species-specific set of opportunistic species (*M. abscessus*, *M. avium* and *M. kansasii*).**

| GO Slim term               | Name       | pvalue      | GO terms included                                             |
|----------------------------|------------|-------------|---------------------------------------------------------------|
| <b><i>M. smegmatis</i></b> |            |             |                                                               |
| GO:0050789                 | regulation | 0.000722436 | cell_redox_homeostasis                                        |
|                            |            |             | negative_regulation_of_cellular_response_to_drug              |
|                            |            |             | negative_regulation_of_phosphate_metabolic_process            |
|                            |            |             | negative_regulation_of_transcription,_DNA-templated           |
|                            |            |             | phosphorelay_signal_transduction_system                       |
|                            |            |             | regulation_of_quinolate_biosynthetic_process                  |
|                            |            |             | regulation_of_transcription,_DNA-templated                    |
|                            |            |             | signal_transduction                                           |
|                            |            |             | signal_transduction_by_protein_phosphorylation                |
|                            |            |             |                                                               |
|                            |            |             |                                                               |
| GO:0006810                 | transport  | 7.59E-14    | am+K15:K33ine_transportamine_transport                        |
|                            |            |             | amino_acid_transmembrane_transport                            |
|                            |            |             | amino_acid_transport                                          |
|                            |            |             | carbohydrate_transmembrane_transport                          |
|                            |            |             | carbohydrate_transport                                        |
|                            |            |             | divalent_inorganic_cation_transport                           |
|                            |            |             | ectoine_transport                                             |
|                            |            |             | ferric_iron_transport                                         |
|                            |            |             | galactose_transport                                           |
|                            |            |             | gluconate_transmembrane_transport                             |
|                            |            |             | glycerol-3-phosphate_transport                                |
|                            |            |             | glycerophosphodiester_transport                               |
|                            |            |             | hydrogen_ion_transmembrane_transport                          |
|                            |            |             | ion_transport                                                 |
|                            |            |             | lactate_transmembrane_transport                               |
|                            |            |             | lactate_transport                                             |
|                            |            |             | monosaccharide_transport                                      |
|                            |            |             | nickel_cation_transmembrane_transport                         |
|                            |            |             | peptide_transport                                             |
|                            |            |             | phosphate_ion_transmembrane_transport                         |
|                            |            |             | phosphate_ion_transport                                       |
|                            |            |             | phosphoenolpyruvate-dependent_sugar_phosphotransferase_system |
|                            |            |             | polyamine_transmembrane_transport                             |
|                            |            |             | polyamine_transport                                           |
|                            |            |             | proline_transmembrane_transport                               |
|                            |            |             | proline_transport                                             |

|            |             |          |                                                                                                |
|------------|-------------|----------|------------------------------------------------------------------------------------------------|
|            |             |          | protein_transport                                                                              |
|            |             |          | proton_transport                                                                               |
|            |             |          | sodium_ion_transport                                                                           |
|            |             |          | sulfate_transmembrane_transport                                                                |
|            |             |          | sulfate_transport                                                                              |
|            |             |          | transmembrane_transport                                                                        |
|            |             |          | transport                                                                                      |
|            |             |          |                                                                                                |
|            |             |          |                                                                                                |
| GO:0016020 | membrane    | 8.11E-05 | ATP-binding_cassette_(ABC)_transporter_complex                                                 |
|            |             |          | cell_outer_membrane                                                                            |
|            |             |          | integral_component_of_membrane                                                                 |
|            |             |          | integral_component_of_plasma_membrane                                                          |
|            |             |          | membrane                                                                                       |
|            |             |          | plasma_membrane                                                                                |
|            |             |          | pore_complex                                                                                   |
|            |             |          | vesicle_membrane                                                                               |
|            |             |          |                                                                                                |
|            |             |          |                                                                                                |
| GO:0005215 | transporter | 3.76E-08 | ATPase-coupled_phosphate_ion_transmembrane_transporter_activity                                |
|            |             |          | ATPase_activity,_coupled_to_transmembrane_movement_of_substances                               |
|            |             |          | amino_acid-transporting_ATPase_activity                                                        |
|            |             |          | amino_acid_transmembrane_transporter_activity                                                  |
|            |             |          | ectoine_transmembrane_transporter_activity                                                     |
|            |             |          | ferric-transporting_ATPase_activity                                                            |
|            |             |          | gluconate_transmembrane_transporter_activity                                                   |
|            |             |          | glycerol-3-phosphate-transporting_ATPase_activity                                              |
|            |             |          | hydrolase_activity,_acting_on_acid_anhydrides,_catalyzing_transmembrane_movement_of_substances |
|            |             |          | lactate_transmembrane_transporter_activity                                                     |
|            |             |          | monosaccharide-transporting_ATPase_activity                                                    |
|            |             |          | nickel-transporting_ATPase_activity                                                            |
|            |             |          | polar-amino_acid-transporting_ATPase_activity                                                  |
|            |             |          | polyamine-transporting_ATPase_activity                                                         |
|            |             |          | porin_activity                                                                                 |
|            |             |          | proline:sodium_symporter_activity                                                              |
|            |             |          | protein-N(PI)-phosphohistidine-sugar_phosphotransferase_activity                               |
|            |             |          | secondary_active_sulfate_transmembrane_transporter_activity                                    |
|            |             |          | substrate-specific_transmembrane_transporter_activity                                          |

|                                   |                    |             |                                                                                                |
|-----------------------------------|--------------------|-------------|------------------------------------------------------------------------------------------------|
|                                   |                    |             | sulfate_transmembrane_transporter_activity                                                     |
|                                   |                    |             | sulfur_carrier_activity                                                                        |
|                                   |                    |             | symporter_activity                                                                             |
|                                   |                    |             | taurine-transporting_ATPase_activity                                                           |
|                                   |                    |             | transmembrane_transporter_activity                                                             |
|                                   |                    |             | transporter_activity                                                                           |
|                                   |                    |             |                                                                                                |
|                                   |                    |             |                                                                                                |
| GO:0003674                        | molecular_function | 1.64E-07    | ATPase-coupled_phosphate_ion_transmembrane_transporter_activity                                |
|                                   |                    |             | ATPase_activity,_coupled_to_transmembrane_movement_of_substances                               |
|                                   |                    |             | amino_acid-transporting_ATPase_activity                                                        |
|                                   |                    |             | amino_acid_transmembrane_transporter_activity                                                  |
|                                   |                    |             | ectoine_transmembrane_transporter_activity                                                     |
|                                   |                    |             | ferric-transporting_ATPase_activity                                                            |
|                                   |                    |             | gluconate_transmembrane_transporter_activity                                                   |
|                                   |                    |             | glycerol-3-phosphate-transporting_ATPase_activity                                              |
|                                   |                    |             | hydrolase_activity,_acting_on_acid_anhydrides,_catalyzing_transmembrane_movement_of_substances |
|                                   |                    |             | lactate_transmembrane_transporter_activity                                                     |
|                                   |                    |             | monosaccharide-transporting_ATPase_activity                                                    |
|                                   |                    |             | nickel-transporting_ATPase_activity                                                            |
|                                   |                    |             | polar-amino_acid-transporting_ATPase_activity                                                  |
|                                   |                    |             | polyamine-transporting_ATPase_activity                                                         |
|                                   |                    |             | porin_activity                                                                                 |
|                                   |                    |             | proline:sodium_symporter_activity                                                              |
|                                   |                    |             | protein-N(PI)-phosphohistidine-sugar_phosphotransferase_activity                               |
|                                   |                    |             | secondary_active_sulfate_transmembrane_transporter_activity                                    |
|                                   |                    |             | sigma_factor_activity                                                                          |
|                                   |                    |             | substrate-specific_transmembrane_transporter_activity                                          |
|                                   |                    |             | sulfate_transmembrane_transporter_activity                                                     |
|                                   |                    |             | sulfur_carrier_activity                                                                        |
|                                   |                    |             | symporter_activity                                                                             |
|                                   |                    |             | taurine-transporting_ATPase_activity                                                           |
|                                   |                    |             | transcription_factor_activity,_sequence-specific_DNA_binding                                   |
|                                   |                    |             | transmembrane_transporter_activity                                                             |
|                                   |                    |             |                                                                                                |
| <b><i>M. thermoresistible</i></b> |                    |             |                                                                                                |
| GO:0016020                        | membrane           | 0.001604591 | ATP-binding_cassette_(ABC)_transporter_complex                                                 |
|                                   |                    |             | integral_component_of_membrane                                                                 |

|                              |                    |             |                                                                                                           |
|------------------------------|--------------------|-------------|-----------------------------------------------------------------------------------------------------------|
|                              |                    |             | membrane                                                                                                  |
|                              |                    |             | plasma_membrane                                                                                           |
|                              |                    |             |                                                                                                           |
|                              |                    |             |                                                                                                           |
| GO:0016491                   | oxidoreduc<br>tase | 8.93E-05    | 4-hydroxy-tetrahydrodipicolinate_reductase                                                                |
|                              |                    |             | L-aspartate:fumarate_oxidoreductase_activity                                                              |
|                              |                    |             | L-aspartate_oxidase_activity                                                                              |
|                              |                    |             | N,N-dimethylaniline_monooxygenase_activity                                                                |
|                              |                    |             | acyl-CoA_dehydrogenase_activity                                                                           |
|                              |                    |             | dioxygenase_activity                                                                                      |
|                              |                    |             | glucose-6-<br>phosphate_dehydrogenase_(coenzyme_F420)_activity                                            |
|                              |                    |             | monooxygenase_activity                                                                                    |
|                              |                    |             | nitrite_reductase_[NAD(P)H]_activity                                                                      |
|                              |                    |             | nitronate_monooxygenase_activity                                                                          |
|                              |                    |             | oxidoreductase_activity                                                                                   |
|                              |                    |             | oxidoreductase_activity,_acting_on_CH-<br>OH_group_of_donors                                              |
|                              |                    |             | oxidoreductase_activity,_acting_on_paired_donors,_with_i<br>ncorporation_or_reduction_of_molecular_oxygen |
|                              |                    |             | oxidoreductase_activity,_acting_on_the_CH-<br>CH_group_of_donors                                          |
|                              |                    |             | oxidoreductase_activity,_acting_on_the_CH-<br>OH_group_of_donors,_NAD_or_NADP_as_acceptor                 |
|                              |                    |             | oxidoreductase_activity,_acting_on_the_aldehyde_or_oxo-<br>group_of_donors,_NAD_or_NADP_as_acceptor       |
|                              |                    |             |                                                                                                           |
|                              |                    |             |                                                                                                           |
| GO:0003824                   | catalytic          | 0.000309454 | N-acetylmuramoyl-L-alanine_amidase_activity                                                               |
|                              |                    |             | catalytic_activity                                                                                        |
|                              |                    |             | transposase_activity                                                                                      |
|                              |                    |             |                                                                                                           |
| <b><i>M. vanbaalenii</i></b> |                    |             |                                                                                                           |
| GO:0050789                   | regulation         | 0.000789493 | cell_redox_homeostasis                                                                                    |
|                              |                    |             | intracellular_signal_transduction                                                                         |
|                              |                    |             | ionotropic_glutamate_receptor_signaling_pathway                                                           |
|                              |                    |             | negative_regulation_of_phosphate_metabolic_process                                                        |
|                              |                    |             | negative_regulation_of_transcription,_DNA-templated                                                       |
|                              |                    |             | phosphorelay_signal_transduction_system                                                                   |
|                              |                    |             | regulation_of_transcription,_DNA-templated                                                                |
|                              |                    |             | signal_transduction                                                                                       |
|                              |                    |             | signal_transduction_by_protein_phosphorylation                                                            |
|                              |                    |             |                                                                                                           |
|                              |                    |             |                                                                                                           |

|            |                    |             |                                                |
|------------|--------------------|-------------|------------------------------------------------|
| GO:0005575 | cellular_component | 0.001191057 | ATP-binding_cassette_(ABC)_transporter_complex |
|            |                    |             | extracellular_matrix                           |
|            |                    |             | integral_component_of_membrane                 |
|            |                    |             | integral_component_of_plasma_membrane          |
|            |                    |             | periplasmic_space                              |
|            |                    |             | plasma_membrane                                |
|            |                    |             | primosome_complex                              |
|            |                    |             | ribosome                                       |
|            |                    |             |                                                |
|            |                    |             |                                                |
| GO:0016020 | membrane           | 3.32E-06    | ATP-binding_cassette_(ABC)_transporter_complex |
|            |                    |             | integral_component_of_membrane                 |
|            |                    |             | integral_component_of_plasma_membrane          |
|            |                    |             | membrane                                       |
|            |                    |             | plasma_membrane                                |
|            |                    |             |                                                |
|            |                    |             |                                                |
| GO:0003676 | nucleic_acid       | 0.000544591 | DNA_binding                                    |
|            |                    |             | RNA_binding                                    |
|            |                    |             | nucleic_acid_binding                           |
|            |                    |             | sequence-specific_DNA_binding                  |
