# Supplementary material for: Decoding the similarities and differences among mycobacterial species
Source: PubMed Central journal article supplement (PMC5595346; doi:10.1371/journal.pntd.0005883), 2017-08-30
Supplement: pntd.0005883.s005.pdf [file pntd.0005883.s005.pdf]

**S5 Table. Go enriched terms in species-specific set of non-pathogenic species (*M. smegmatis*, *M. thermoresistibile* and *M. vanbaalenii*).**

| GO Slim term               | Name                        | pvalue   | GO terms included                                                                                     |
|----------------------------|-----------------------------|----------|-------------------------------------------------------------------------------------------------------|
| <b><i>M. abscessus</i></b> |                             |          |                                                                                                       |
| GO:0005575                 | cellular_<br>component      | 7.12E-06 | ATP-binding_cassette_(ABC)_transporter_complex                                                        |
|                            |                             |          | cytosol                                                                                               |
|                            |                             |          | high-affinity_iron_permease_complex                                                                   |
|                            |                             |          | integral_component_of_membrane                                                                        |
|                            |                             |          | nucleoid                                                                                              |
|                            |                             |          | phosphopyruvate_hydratase_complex                                                                     |
|                            |                             |          | plasma_membrane                                                                                       |
|                            |                             |          | respiratory_chain                                                                                     |
| GO:0016020                 | membrane                    | 6.99E-10 | ATP-binding_cassette_(ABC)_transporter_complex                                                        |
|                            |                             |          | high-affinity_iron_permease_complex                                                                   |
|                            |                             |          | integral_component_of_membrane                                                                        |
|                            |                             |          | membrane                                                                                              |
|                            |                             |          | plasma_membrane                                                                                       |
|                            |                             |          | respiratory_chain                                                                                     |
| GO:0016491                 | oxidoreduct<br>ase activity | 5.54E-05 | 2,3-dihydro-2,3-dihydroxybenzoate_dehydrogenase_activity                                              |
|                            |                             |          | 3-hydroxyisobutyrate_dehydrogenase_activity                                                           |
|                            |                             |          | 4-hydroxyphenylpyruvate_dioxygenase_activity                                                          |
|                            |                             |          | N,N-dimethylaniline_monooxygenase_activity                                                            |
|                            |                             |          | acyl-CoA_dehydrogenase_activity                                                                       |
|                            |                             |          | acyl-[acyl-carrier-protein]_desaturase_activity                                                       |
|                            |                             |          | dihydrolipoyl_dehydrogenase_activity                                                                  |
|                            |                             |          | dioxygenase_activity                                                                                  |
|                            |                             |          | glutamate_dehydrogenase_(NAD+)_activity                                                               |
|                            |                             |          | glutamate_synthase_activity                                                                           |
|                            |                             |          | heme_oxygenase_(decyclizing)_activity                                                                 |
|                            |                             |          | malate_dehydrogenase_(menaquinone)_activity                                                           |
|                            |                             |          | malate_dehydrogenase_(quinone)_activity                                                               |
|                            |                             |          | methylenetetrahydrofolate_reductase_(NAD(P)H)_activity                                                |
|                            |                             |          | monooxygenase_activity                                                                                |
|                            |                             |          | oxidoreductase_activity                                                                               |
|                            |                             |          | oxidoreductase_activity,_acting_on_CH-OH_group_of_donors                                              |
|                            |                             |          | oxidoreductase_activity,_acting_on_a_sulfur_group_of_donors,_NAD(P)_as_acceptor                       |
|                            |                             |          | oxidoreductase_activity,_acting_on_a_sulfur_group_of_donors,_disulfide_as_acceptor                    |
|                            |                             |          | oxidoreductase_activity,_acting_on_paired_donors,_with_incorporation_or_reduction_of_molecular_oxygen |

|                 |           |                 |                                                                                                     |
|-----------------|-----------|-----------------|-----------------------------------------------------------------------------------------------------|
|                 |           |                 | oxidoreductase_activity,_acting_on_single_donors_with_inco<br>rporation_of_molecular_oxygen         |
|                 |           |                 | oxidoreductase_activity,_acting_on_the_CH-<br>CH_group_of_donors                                    |
|                 |           |                 | oxidoreductase_activity,_acting_on_the_CH-<br>NH2_group_of_donors                                   |
|                 |           |                 | oxidoreductase_activity,_acting_on_the_aldehyde_or_oxo_gr<br>oup_of_donors,_NAD_or_NADP_as_acceptor |
|                 |           |                 | peptide-methionine_(R)-S-oxide_reductase_activity                                                   |
|                 |           |                 | peroxiredoxin_activity                                                                              |
|                 |           |                 | phenylacetyl-CoA_1,2-epoxidase_activity                                                             |
|                 |           |                 | phosphogluconate_dehydrogenase_(decarboxylating)_activity                                           |
|                 |           |                 | pyridoxamine-phosphate_oxidase_activity                                                             |
|                 |           |                 | sulfite_reductase_(NADPH)_activity                                                                  |
|                 |           |                 | superoxide_dismutase_activity                                                                       |
|                 |           |                 |                                                                                                     |
|                 |           |                 |                                                                                                     |
| <b>M. avium</b> |           |                 |                                                                                                     |
| GO:0008152      | metabolic | 0.0024614<br>74 | DNA_integration                                                                                     |
|                 |           |                 | DNA_ligation_involved_in_DNA_repair                                                                 |
|                 |           |                 | DNA_metabolic_process                                                                               |
|                 |           |                 | DNA_methylation                                                                                     |
|                 |           |                 | DNA_modification                                                                                    |
|                 |           |                 | DNA_recombination                                                                                   |
|                 |           |                 | DNA_repair                                                                                          |
|                 |           |                 | DNA_replication                                                                                     |
|                 |           |                 | DNA_replication,_synthesis_of_RNA_primer                                                            |
|                 |           |                 | aromatic_compound_catabolic_process                                                                 |
|                 |           |                 | base-excision_repair                                                                                |
|                 |           |                 | carbohydrate_metabolic_process                                                                      |
|                 |           |                 | cell_wall_macromolecule_catabolic_process                                                           |
|                 |           |                 | cellular_aromatic_compound_metabolic_process                                                        |
|                 |           |                 | cyclic_nucleotide_biosynthetic_process                                                              |
|                 |           |                 | dephosphorylation                                                                                   |
|                 |           |                 | fatty_acid_beta-oxidation                                                                           |
|                 |           |                 | fatty_acid_metabolic_process                                                                        |
|                 |           |                 | glucose_metabolic_process                                                                           |
|                 |           |                 | glycolytic_process                                                                                  |
|                 |           |                 | intein-mediated_protein_splicing                                                                    |
|                 |           |                 | lipid_metabolic_process                                                                             |
|                 |           |                 | lysine_biosynthetic_process_via_diaminopimelate                                                     |
|                 |           |                 | mannitol_metabolic_process                                                                          |
|                 |           |                 | metabolic_process                                                                                   |

|            |                |                 |                                                             |
|------------|----------------|-----------------|-------------------------------------------------------------|
|            |                |                 | methylation                                                 |
|            |                |                 | nucleic_acid_phosphodiester_bond_hydrolysis                 |
|            |                |                 | nucleotide-excision_repair                                  |
|            |                |                 | oxidation-reduction_process                                 |
|            |                |                 | pentose-phosphate_shunt                                     |
|            |                |                 | peptidoglycan_catabolic_process                             |
|            |                |                 | phosphatidylinositol_phosphorylation                        |
|            |                |                 | phosphorylation                                             |
|            |                |                 | protein_phosphorylation                                     |
|            |                |                 | proteolysis                                                 |
|            |                |                 | pyridoxal_phosphate_biosynthetic_process                    |
|            |                |                 | pyruvate_metabolic_process                                  |
|            |                |                 | rRNA_methylation                                            |
|            |                |                 | rRNA_modification                                           |
|            |                |                 | regulation_of_transcription,_DNA-templated                  |
|            |                |                 | removal_of_superoxide_radicals                              |
|            |                |                 | signal_transduction_by_protein_phosphorylation              |
|            |                |                 | superoxide_metabolic_process                                |
|            |                |                 | tRNA_thio-modification                                      |
|            |                |                 | thiamine_biosynthetic_process                               |
|            |                |                 | thiamine_diphosphate_biosynthetic_process                   |
|            |                |                 | transcription,_DNA-templated                                |
|            |                |                 | transposition,_DNA-mediated                                 |
|            |                |                 | tryptophan_catabolic_process_to_kynurenine                  |
|            |                |                 |                                                             |
|            |                |                 |                                                             |
| GO:0016020 | membrane       | 0.0002895<br>08 | ATP-binding_cassette_(ABC)_transporter_complex              |
|            |                |                 | integral_component_of_membrane                              |
|            |                |                 | membrane                                                    |
|            |                |                 | plasma_membrane                                             |
|            |                |                 |                                                             |
|            |                |                 |                                                             |
| GO:0016491 | oxidoreductase | 0.0001704<br>77 | (+)-trans-carveol_dehydrogenase_activity                    |
|            |                |                 | 3-hydroxyacyl-CoA_dehydrogenase_activity                    |
|            |                |                 | 3-oxo-pimeloyl-[acp]_methyl_ester_reductase_activity        |
|            |                |                 | 3-oxoacyl-[acyl-carrier-protein]_reductase_(NADPH)_activity |
|            |                |                 | 4-hydroxy-tetrahydrodipicolinate_reductase                  |
|            |                |                 | acyl-CoA_dehydrogenase_activity                             |
|            |                |                 | dioxygenase_activity                                        |
|            |                |                 | glucose-6-phosphate_dehydrogenase_activity                  |
|            |                |                 | monooxygenase_activity                                      |

|                           |                    |             |                                                                                                                                                                                      |
|---------------------------|--------------------|-------------|--------------------------------------------------------------------------------------------------------------------------------------------------------------------------------------|
|                           |                    |             | morphine_6-dehydrogenase_activity                                                                                                                                                    |
|                           |                    |             | oxidoreductase_activity                                                                                                                                                              |
|                           |                    |             | oxidoreductase_activity,_acting_on_paired_donors,_with_incorporation_or_reduction_of_molecular_oxygen                                                                                |
|                           |                    |             | oxidoreductase_activity,_acting_on_paired_donors,_with_incorporation_or_reduction_of_molecular_oxygen,_NAD(P)H_as_one_donor,_and_incorporation_of_two_atoms_of_oxygen_into_one_donor |
|                           |                    |             | oxidoreductase_activity,_acting_on_the_CH-CH_group_of_donors                                                                                                                         |
|                           |                    |             | oxidoreductase_activity,_acting_on_the_aldehyde_or_oxo_group_of_donors,_NAD_or_NADP_as_acceptor                                                                                      |
|                           |                    |             | peroxiredoxin_activity                                                                                                                                                               |
|                           |                    |             | protein_disulfide_oxidoreductase_activity                                                                                                                                            |
|                           |                    |             | pyridoxamine-phosphate_oxidase_activity                                                                                                                                              |
|                           |                    |             | superoxide_dismutase_activity                                                                                                                                                        |
|                           |                    |             |                                                                                                                                                                                      |
| <b><i>M. kansasii</i></b> |                    |             |                                                                                                                                                                                      |
| GO:0005575                | cellular_component | 0.001156494 | ATP-binding_cassette_(ABC)_transporter_complex                                                                                                                                       |
|                           |                    |             | integral_component_of_membrane                                                                                                                                                       |
|                           |                    |             | nucleoid                                                                                                                                                                             |
|                           |                    |             | plasma_membrane                                                                                                                                                                      |
|                           |                    |             | respiratory_chain                                                                                                                                                                    |
|                           |                    |             |                                                                                                                                                                                      |
|                           |                    |             |                                                                                                                                                                                      |
| GO:0016020                | membrane           | 3.38E-05    | ATP-binding_cassette_(ABC)_transporter_complex                                                                                                                                       |
|                           |                    |             | integral_component_of_membrane                                                                                                                                                       |
|                           |                    |             | membrane                                                                                                                                                                             |
|                           |                    |             | plasma_membrane                                                                                                                                                                      |
|                           |                    |             | respiratory_chain                                                                                                                                                                    |
