# Supplementary material for: Decoding the similarities and differences among mycobacterial species
Source: PubMed Central journal article supplement (PMC5595346; doi:10.1371/journal.pntd.0005883), 2017-08-30
Supplement: pntd.0005883.s006.pdf [file pntd.0005883.s006.pdf]

**S6 Table. *Mycobacterium leprae* specific proteins.** The unique proteins present in the genome of *M. leprae* mapped for their GO functions, subcellular and transmembrane localization, gene expression profiles from a GEO dataset (under-expressed in green, over-expressed in red), essentiality (flux balance based predictions), virulence and presence of human orthologs.

| Entry  | Gene names | Length | Human Homologues | Gene Expression | Gene ontology (GO)                          | Transmembrane |
|--------|------------|--------|------------------|-----------------|---------------------------------------------|---------------|
| Q9CBI3 | ML1928     | 45     | No               | -2.07           | integral component of membrane [GO:0016021] | Yes           |
| Q9CCI8 | ML0777     | 64     | No               | -0.49           | integral component of membrane [GO:0016021] | Yes           |
| Q9CBV9 | ML1523     | 96     | No               | 0.08            | integral component of membrane [GO:0016021] | Yes           |
| Q9CDF0 | ML0009     | 63     | No               | -0.14           | integral component of membrane [GO:0016021] | Yes           |
| Q7AQ76 | ML1292     | 80     | No               | 0.00            | integral component of membrane [GO:0016021] | Yes           |
| Q7APW0 | ML2347     | 336    | No               | 0.28            | integral component of membrane [GO:0016021] | Yes           |
| Q9CCC6 | ML0958     | 143    | No               | -0.68           | integral component of membrane [GO:0016021] | Yes           |
| Q9CCZ1 | ML2651     | 105    | No               | -0.46           | integral component of membrane [GO:0016021] | Yes           |

|        |                          |     |    |       |                                                                                                                                                           |     |
|--------|--------------------------|-----|----|-------|-----------------------------------------------------------------------------------------------------------------------------------------------------------|-----|
| Q9CBG6 | ML1990                   | 80  | No | -1.27 | integral component of membrane [GO:0016021]                                                                                                               | Yes |
| Q7AQ91 | ML1148                   | 51  | No | -0.19 |                                                                                                                                                           |     |
| Q9CC35 | ML1344                   | 86  | No | -0.91 | DNA binding [GO:0003677]                                                                                                                                  |     |
| Q9CBR2 | ML1717                   | 97  | No | -0.04 |                                                                                                                                                           |     |
| Q9CBD1 | ML2177                   | 317 | No | 0.13  | cytoplasm [GO:0005737]; uridine phosphorylase activity [GO:0004850]; nucleoside metabolic process [GO:0009116]; nucleotide catabolic process [GO:0009166] |     |
| Q07297 | sra ML0411<br>MLCL383.14 | 408 | No | 0.18  |                                                                                                                                                           |     |
| Q9CDF1 | ML0008                   | 124 | No | -0.73 |                                                                                                                                                           |     |
| Q9CDE2 | ML0024                   | 83  | No | -0.06 |                                                                                                                                                           |     |
| Q9CDE1 | ML0025                   | 96  | No | -0.68 |                                                                                                                                                           |     |
| Q9CDC8 | ML0070                   | 87  | No | 0.11  |                                                                                                                                                           |     |
| Q9CD77 | ML0141                   | 84  | No | -0.50 |                                                                                                                                                           |     |
| Q9CD73 | ML0152                   | 62  | No | -0.85 |                                                                                                                                                           |     |
| Q7AQN3 | ML0162                   | 92  | No | -0.28 |                                                                                                                                                           |     |
| Q9CD59 | ML0217                   | 81  | No | -0.29 |                                                                                                                                                           |     |
| Q7AQL5 | ML0218                   | 128 | No | 0.02  |                                                                                                                                                           |     |
| Q7AQK1 | ML0291                   | 130 | No | -0.36 |                                                                                                                                                           |     |
| Q9CCX2 | ML0292                   | 79  | No | -1.78 |                                                                                                                                                           |     |
| Q9CCX1 | ML0293                   | 69  | No | 1.49  |                                                                                                                                                           |     |
| Q7AQJ8 | ML0308                   | 234 | No | 0.06  |                                                                                                                                                           |     |

|        |        |     |    |       |                                                                                                                                                                                                                     |
|--------|--------|-----|----|-------|---------------------------------------------------------------------------------------------------------------------------------------------------------------------------------------------------------------------|
| Q9CCU2 | ML0447 | 158 | No | 0.00  | heme binding<br>[GO:0020037];<br>iron ion<br>binding<br>[GO:0005506];<br>oxidoreductase<br>activity, acting<br>on paired<br>donors, with<br>incorporation<br>or reduction of<br>molecular<br>oxygen<br>[GO:0016705] |
| Q7AQJ2 | ML0448 | 90  | No | 0.34  |                                                                                                                                                                                                                     |
| Q9CCT8 | ML0464 | 95  | No | -0.75 |                                                                                                                                                                                                                     |
| Q7AQI7 | ML0470 | 96  | No | -0.71 |                                                                                                                                                                                                                     |
| Q9CCR6 | ML0527 | 84  | No | 0.09  |                                                                                                                                                                                                                     |
| Q9CCN7 | ML0568 | 197 | No | -0.91 |                                                                                                                                                                                                                     |
| Q7AQI4 | ML0574 | 105 | No | -0.21 |                                                                                                                                                                                                                     |
| Q7AQI3 | ML0576 | 76  | No | -0.76 |                                                                                                                                                                                                                     |
| Q7AQH1 | ML0656 | 93  | No | -0.13 |                                                                                                                                                                                                                     |
| Q7AQH0 | ML0659 | 108 | No | -0.19 |                                                                                                                                                                                                                     |
| Q9CCM5 | ML0664 | 87  | No | -0.15 |                                                                                                                                                                                                                     |
| Q9CCM3 | ML0679 | 75  | No | 0.00  |                                                                                                                                                                                                                     |
| Q9CCK3 | ML0757 | 230 | No | -0.43 |                                                                                                                                                                                                                     |
| Q9CCG0 | ML0837 | 127 | No | -0.68 |                                                                                                                                                                                                                     |
| Q7AQE5 | ML0863 | 104 | No | -0.46 |                                                                                                                                                                                                                     |
| Q9CCD5 | ML0928 | 94  | No | -0.65 |                                                                                                                                                                                                                     |
| Q9CCD4 | ML0938 | 98  | No | -0.50 |                                                                                                                                                                                                                     |
| Q9CCD3 | ML0939 | 80  | No | -0.13 |                                                                                                                                                                                                                     |
| Q9CCD0 | ML0950 | 66  | No | -0.13 |                                                                                                                                                                                                                     |
| Q9CCC7 | ML0957 | 124 | No | 0.17  |                                                                                                                                                                                                                     |
| Q9CCC5 | ML0959 | 117 | No | -0.21 |                                                                                                                                                                                                                     |
| Q9CCC4 | ML0963 | 154 | No | -0.04 |                                                                                                                                                                                                                     |
| Q9CCC3 | ML0964 | 85  | No | -0.04 |                                                                                                                                                                                                                     |
| Q9CCB7 | ML1010 | 80  | No | 0.00  |                                                                                                                                                                                                                     |
| Q9CCB6 | ML1011 | 140 | No | 0.30  |                                                                                                                                                                                                                     |
| Q9CCB3 | ML1018 | 71  | No | 0.15  |                                                                                                                                                                                                                     |
| Q7AQA0 | ML1057 | 117 | No | -0.84 |                                                                                                                                                                                                                     |
| Q9CC71 | ML1186 | 100 | No | 0.37  |                                                                                                                                                                                                                     |
| Q9CC60 | ML1243 | 153 | No | 1.66  |                                                                                                                                                                                                                     |
| Q9CC51 | ML1275 | 78  | No | -0.51 |                                                                                                                                                                                                                     |

|        |                        |     |    |       |                                                                             |  |
|--------|------------------------|-----|----|-------|-----------------------------------------------------------------------------|--|
| Q9CC28 | ML1384                 | 112 | No | -0.59 |                                                                             |  |
| Q9CC03 | ML1445                 | 74  | No | -0.76 |                                                                             |  |
| Q9CBU8 | ML1575                 | 97  | No | 0.21  |                                                                             |  |
| Q7AQ39 | ML1601                 | 121 | No | 0.15  | catalytic activity<br>[GO:0003824];<br>biosynthetic process<br>[GO:0009058] |  |
| Q9CBT9 | ML1602                 | 106 | No | -0.19 |                                                                             |  |
| Q9CBT8 | ML1603                 | 86  | No | -0.77 |                                                                             |  |
| Q9CBT7 | ML1604                 | 129 | No | -0.33 |                                                                             |  |
| Q9CBT6 | ML1605                 | 66  | No | -0.46 |                                                                             |  |
| Q7AQ24 | ML1788                 | 154 | No | 0.07  |                                                                             |  |
| Q9CBJ3 | ML1915                 | 114 | No | -0.06 |                                                                             |  |
| Q9CBH4 | ML1976                 | 115 | No | 0.34  |                                                                             |  |
| Q9CBH3 | ML1979                 | 135 | No | 0.31  |                                                                             |  |
| Q9CBG7 | ML1989                 | 116 | No | -0.16 |                                                                             |  |
| Q9CBF6 | ML2035                 | 87  | No | 0.06  |                                                                             |  |
| Q9CBF4 | ML2044                 | 73  | No | -0.67 |                                                                             |  |
| Q9CBD4 | ML2172                 | 118 | No | 0.12  |                                                                             |  |
| Q9CBD2 | ML2176                 | 85  | No | -1.33 |                                                                             |  |
| Q9CBC5 | ML2201                 | 79  | No | -1.00 |                                                                             |  |
| Q9CBC0 | ML2244                 | 113 | No | -0.27 |                                                                             |  |
| Q9CBB9 | ML2249                 | 105 | No | -0.21 |                                                                             |  |
| Q7APX0 | ML2252                 | 78  | No | -0.37 |                                                                             |  |
| Q9CBA2 | ML2283                 | 104 | No | 1.04  |                                                                             |  |
| Q9CBA1 | ML2284                 | 119 | No | -0.18 |                                                                             |  |
| Q49942 | ML2346                 | 301 | No | 0.14  |                                                                             |  |
| Q9CB35 | ML2468                 | 126 | No | -1.19 |                                                                             |  |
| Q9CD23 | ML2562                 | 96  | No | -0.37 |                                                                             |  |
| Q9CD21 | ML2567                 | 159 | No | 0.00  |                                                                             |  |
| Q9CCY7 | ML2666                 | 84  | No | -0.56 |                                                                             |  |
| Q49769 | ML0638<br>B1937_F3_110 | 100 | No | -0.45 | extracellular region<br>[GO:0005576]                                        |  |
