# Supplementary material for: Decoding the similarities and differences among mycobacterial species
Source: PubMed Central journal article supplement (PMC5595346; doi:10.1371/journal.pntd.0005883), 2017-08-30
Supplement: pntd.0005883.s007.pdf [file pntd.0005883.s007.pdf]

**S7 Table: Predicted linear B-cell epitopes in *Mycobacterium leprae* specific proteins.**

| <b>M. leprae ID</b> | <b>Start position in sequence</b> | <b>End position in sequence</b> | <b>Length of epitope</b> | <b>Average score for all residues</b> | <b>Peptide sequence</b>         |
|---------------------|-----------------------------------|---------------------------------|--------------------------|---------------------------------------|---------------------------------|
| ML0008              | 78                                | 97                              | 20                       | 0.9276                                | AQTDEEVYSRPISDNTEYGV            |
| ML0008              | 59                                | 71                              | 13                       | 1.041461538                           | AGHQSSKAEGVNT                   |
| ML0024              | 34                                | 45                              | 12                       | 0.922083333                           | ADAFDDKPELGN                    |
| ML0024              | 55                                | 65                              | 11                       | 0.760818182                           | AAIRGAGDDCG                     |
| ML0070              | 20                                | 29                              | 10                       | 0.6982                                | QHAVGGGPVV                      |
| ML0141              | 57                                | 71                              | 15                       | 1.581                                 | RHVPEAPRPTSHGTS                 |
| ML0141              | 28                                | 37                              | 10                       | 0.9513                                | GNRGGTGMRG                      |
| ML0152              | 27                                | 40                              | 14                       | 1.105714286                           | MAQANRSTDQGNA                   |
| ML0162              | 34                                | 60                              | 27                       | 1.068111111                           | DQIGNGSSSRAPSLGNPHTAVPNVMA<br>D |
| ML0162              | 79                                | 90                              | 12                       | 1.091083333                           | DQSGNHSDQKHV                    |
| ML0217              | 2                                 | 13                              | 12                       | 1.01675                               | GVGRPCAEEPQT                    |
| ML0217              | 22                                | 31                              | 10                       | 0.9867                                | GLSGGAGSSA                      |
| ML0218              | 17                                | 39                              | 23                       | 0.979086957                           | TLRSKDPKQGNWPVTVSSEVAAN         |
| ML0218              | 94                                | 112                             | 19                       | 0.819684211                           | KPIASSYAVGTASNSDKTI             |
| ML0291              | 95                                | 115                             | 21                       | 1.396380952                           | TPTFQPTKTTDRTKRSPRSNT           |
| ML0291              | 10                                | 28                              | 19                       | 1.011315789                           | VNAHSSSSVATDPNEVFHQ             |
| ML0291              | 68                                | 78                              | 11                       | 0.798545455                           | AHRTTETKNLS                     |
| ML0292              | 69                                | 79                              | 11                       | 1.415181818                           | DPIPRAKYPGP                     |
| ML0293              | 7                                 | 16                              | 10                       | 1.041                                 | FDDDSPKQIQ                      |
| ML0293              | 40                                | 49                              | 10                       | 0.9472                                | HRQTSSGTVS                      |
| ML0308              | 38                                | 58                              | 21                       | 0.917380952                           | CPGGASSATAEINAAGGRSMA           |
| ML0308              | 78                                | 94                              | 17                       | 0.766882353                           | AETDRGNAYVRAHPDEY               |
| ML0308              | 101                               | 111                             | 11                       | 0.790636364                           | SPEHHHQSRSR                     |
| ML0411              | 209                               | 231                             | 23                       | 0.959695652                           | SVAQSEEHGSDSMSQSYNTCGSV         |
| ML0411              | 235                               | 255                             | 21                       | 1.230047619                           | ELCDSPEFGTSPSSQSNLDSA           |
| ML0411              | 372                               | 388                             | 17                       | 0.885882353                           | TAVSGPLEGVTQPAEEV               |
| ML0411              | 185                               | 200                             | 16                       | 0.70325                               | DSVNSFHSSSSSDSLY                |
| ML0411              | 393                               | 406                             | 14                       | 1.422928571                           | VAGGSGTGGPAFNE                  |
| ML0411              | 347                               | 358                             | 12                       | 0.785416667                           | ENWATASQPVMA                    |
| ML0411              | 164                               | 174                             | 11                       | 0.825909091                           | GKMENFEPAPQ                     |
| ML0411              | 18                                | 27                              | 10                       | 1.1706                                | RGPGSTPLWG                      |
| ML0447              | 131                               | 148                             | 18                       | 1.096444444                           | PMPGGPMLTNSTPTESCR              |
| ML0447              | 4                                 | 16                              | 13                       | 1.269307692                           | SADPSTGEQLDLD                   |
| ML0447              | 58                                | 68                              | 11                       | 0.598454545                           | EIYQNRSDRGI                     |
| ML0448              | 26                                | 47                              | 22                       | 0.847818182                           | RPITAQQTSVSAASWYKPKGTM          |
| ML0464              | 57                                | 76                              | 20                       | 1.3438                                | DSTSVGPGPGNMPWLDDPGL            |

|        |     |     |    |             |                                   |
|--------|-----|-----|----|-------------|-----------------------------------|
| ML0527 | 9   | 21  | 13 | 0.714769231 | VKGGHHRQPQRALH                    |
| ML0527 | 44  | 53  | 10 | 0.9073      | SIPATRTTRQ                        |
| ML0568 | 164 | 181 | 18 | 1.403388889 | PGPPASVEAPPAAAPVVA                |
| ML0568 | 26  | 43  | 18 | 0.997333333 | PSAAAAPLSMPTGGPTCI                |
| ML0568 | 146 | 156 | 11 | 1.223909091 | KGVPTASPQAA                       |
| ML0576 | 25  | 35  | 11 | 1.111727273 | TGNARTAEDWP                       |
| ML0638 | 17  | 42  | 26 | 0.913807692 | STAGTPHAATSAAAGQYRVAATGTRP        |
| ML0638 | 60  | 70  | 11 | 0.950909091 | PRNRNHQDPWH                       |
| ML0656 | 71  | 93  | 23 | 1.192434783 | VDSSQPHHQKTEISQQENNRGK            |
| ML0659 | 25  | 46  | 22 | 1.106136364 | KPGAGKLDGAKNDAGKRKKTLS            |
| ML0659 | 48  | 58  | 11 | 0.813636364 | KHSIPGRWPSA                       |
| ML0664 | 56  | 66  | 11 | 0.963363636 | EGMAGKDIDPR                       |
| ML0679 | 60  | 75  | 16 | 1.023375    | VTALDDRAGAGLDHPSQ                 |
| ML0679 | 21  | 32  | 12 | 1.269833333 | GSGSGPAAPVWP                      |
| ML0679 | 38  | 48  | 11 | 0.973727273 | PAASYQPWPEQ                       |
| ML0757 | 189 | 205 | 17 | 1.232352941 | PVTGRVDSNLPDPQSPL                 |
| ML0757 | 83  | 99  | 17 | 0.797705882 | VRPQNFDVGYRPDGARI                 |
| ML0757 | 61  | 72  | 12 | 1.191083333 | ASQLQPSQPDCV                      |
| ML0757 | 104 | 115 | 12 | 0.793       | KTLNDHDSVGKN                      |
| ML0757 | 1   | 12  | 12 | 0.74575     | MQPMPGINLPKD                      |
| ML0863 | 33  | 47  | 15 | 0.8016      | SAPGRSEIDVEGISA                   |
| ML0928 | 54  | 67  | 14 | 1.149928571 | DPENNPRLRDPQSL                    |
| ML0938 | 86  | 98  | 13 | 0.931769231 | EETARNVLPPEEE                     |
| ML0939 | 15  | 28  | 14 | 0.840857143 | HTWGPSKFGQSQSC                    |
| ML0950 | 34  | 51  | 18 | 1.524277778 | GHAPEQRNASPSTPTGVI                |
| ML0957 | 66  | 94  | 29 | 1.183862069 | QCVDSADTPNHRGNSAGNRHPDRLRA<br>DAA |
| ML0957 | 20  | 29  | 10 | 0.9448      | RSGYPTRWGG                        |
| ML0959 | 78  | 100 | 23 | 0.993347826 | PLPQRGESRRDPAMTMDETVASG           |
| ML0959 | 39  | 53  | 15 | 1.213       | QQEKNRPDRVDQHGN                   |
| ML0959 | 12  | 22  | 11 | 1.141545455 | NIAPSNRRPAG                       |
| ML0963 | 1   | 14  | 14 | 0.891857143 | MPRTGDVYGDVRRD                    |
| ML1010 | 25  | 47  | 23 | 1.835521739 | AVDEDCTNAGRGPPDPPPARARV           |
| ML1011 | 78  | 102 | 25 | 1.74124     | GAVPSESAEPTCDSTAPPANSGNH          |
| ML1011 | 26  | 42  | 17 | 0.995823529 | LGDHQTNPMTADPLTHG                 |
| ML1011 | 45  | 59  | 15 | 0.998466667 | LVPLTSPSHANKGNP                   |
| ML1018 | 55  | 71  | 17 | 0.690117647 | HRNEQHSVAGYASSHR                  |
| ML1057 | 65  | 88  | 24 | 1.24375     | ADVAGAAKSGPVQPMGDRGSVSPV          |
| ML1057 | 101 | 112 | 12 | 0.912333333 | RAFAMPSSPAAG                      |
| ML1148 | 1   | 14  | 14 | 1.073428571 | MRDEKQPFEANTAG                    |
| ML1186 | 1   | 15  | 15 | 0.841933333 | MTQKDGSTLIGPAAH                   |
| ML1186 | 53  | 63  | 11 | 1.250727273 | PDLPPGDRGFL                       |

|        |     |     |    |             |                            |
|--------|-----|-----|----|-------------|----------------------------|
| ML1243 | 119 | 129 | 11 | 1.062818182 | EEKNPLAPSAK                |
| ML1243 | 143 | 153 | 11 | 0.994636364 | RTGPCRHPRRD                |
| ML1275 | 60  | 75  | 16 | 0.665       | TWSSSLTSSQTQWHRS           |
| ML1292 | 8   | 19  | 12 | 0.978416667 | DVQVPPSTYYTV               |
| ML1292 | 66  | 76  | 11 | 0.897454545 | LRSRQGDTADV                |
| ML1344 | 36  | 57  | 22 | 1.516545455 | WSRRAGTGPDTPAEGHGSRIDH     |
| ML1384 | 97  | 112 | 16 | 1.288875    | DGPDNPFGIGVGP GD           |
| ML1384 | 58  | 69  | 12 | 1.005916667 | ENRGAQAQGWKQ               |
| ML1384 | 79  | 90  | 12 | 1.2435      | SAGSGSSNIKPP               |
| ML1445 | 11  | 20  | 10 | 1.1919      | PQANKDGRRRA                |
| ML1575 | 2   | 12  | 11 | 0.905545455 | MPWGWSPGRWWS               |
| ML1601 | 102 | 114 | 13 | 0.753769231 | DDDLVTSVPPCGR              |
| ML1604 | 17  | 26  | 10 | 1.2011      | SDAPADEVVP                 |
| ML1605 | 39  | 54  | 16 | 0.8398125   | GRFGPGIANPWTPIAD           |
| ML1717 | 48  | 60  | 13 | 1.156615385 | EVSPSSMNDNRGP              |
| ML1788 | 3   | 18  | 16 | 1.3664375   | DLSDSAAGPQSGPELG           |
| ML1788 | 30  | 45  | 16 | 0.847625    | QAQFNGQYQTGELGAH           |
| ML1788 | 110 | 124 | 15 | 0.615133333 | QRRHRQVSSTEPIT             |
| ML1915 | 45  | 55  | 11 | 1.298636364 | SGHTDEQDDAL                |
| ML1915 | 18  | 27  | 10 | 1.1588      | GVATPQQTDQ                 |
| ML1915 | 83  | 92  | 10 | 0.5958      | LYGAGPVKAV                 |
| ML1976 | 99  | 115 | 17 | 0.876764706 | GRGEETLSANIPTSKSR          |
| ML1976 | 50  | 63  | 14 | 0.818142857 | ATTKPAIRPEISDA             |
| ML1979 | 76  | 90  | 15 | 0.741466667 | PIGSSSVSCVPEPNS            |
| ML1979 | 48  | 57  | 10 | 0.8398      | MSVPSADGAA                 |
| ML1989 | 77  | 102 | 26 | 1.162153846 | KTTSNSPSDDLHNSNPQPEIYSTKST |
| ML2035 | 52  | 72  | 21 | 1.255190476 | QEPNGLVDPA AASSKPDWNP      |
| ML2035 | 22  | 41  | 20 | 1.1337      | VDGPRPSLPKSIDEGRWDR T      |
| ML2044 | 36  | 45  | 10 | 0.8911      | EQNTQAPAVR                 |
| ML2172 | 100 | 114 | 15 | 1.175066667 | PSALGGPDQRTTRTA            |
| ML2172 | 40  | 53  | 14 | 0.670285714 | DRLEHNLPNSGWDC             |
| ML2176 | 71  | 85  | 15 | 1.059       | ATTPYTSEPV CSTQS           |
| ML2249 | 79  | 90  | 12 | 0.823416667 | SHAAA HAPQADK              |
| ML2252 | 62  | 71  | 10 | 1.0663      | DIDNDGSAVA                 |
| ML2284 | 67  | 86  | 20 | 0.98085     | DSATAEVT SKEDNYSQVQVT      |
| ML2284 | 105 | 119 | 15 | 0.988       | GYPIYPPVPTIRKPS            |
| ML2346 | 190 | 203 | 14 | 1.415785714 | RKHSRYKPPNPARE             |
| ML2346 | 157 | 168 | 12 | 1.065       | SNVSSPGGAFDA               |
| ML2347 | 159 | 174 | 16 | 1.17725     | TWAGSDEHQHNAPSDL           |
| ML2468 | 77  | 96  | 20 | 0.75735     | ASSTDYRDHRAHQPV TLPQR      |
| ML2468 | 103 | 121 | 19 | 1.225684211 | HRRTEQSECTNSGGRPTTV        |
| ML2562 | 13  | 26  | 14 | 0.992285714 | AAEPCAPEGHRIEG             |

|        |     |     |    |             |                             |
|--------|-----|-----|----|-------------|-----------------------------|
| ML2562 | 71  | 84  | 14 | 1.259071429 | LASGPAERADPCRP              |
| ML2562 | 29  | 40  | 12 | 0.69525     | HALPWPADRIQR                |
| ML2567 | 62  | 88  | 27 | 1.136925926 | SVTPASPPRKNHAVSSDFKTRSTNTEN |
| ML2567 | 136 | 157 | 22 | 1.105590909 | LRQPDGSARHANHPFDQPSSRM      |
| ML2567 | 105 | 126 | 22 | 1.524818182 | PSNITEGTNASKSPQPAPTLTS      |
| ML2567 | 37  | 53  | 17 | 1.188941176 | QVRPGKPINNTNTTPAA           |
| ML2651 | 36  | 48  | 13 | 0.746384615 | EQAITPRTRSTIA               |
| ML2666 | 9   | 30  | 22 | 1.464       | LHPGSSSTKNSTTSGNTAVTT       |
